# Supplementary material
Source: PubMed Central journal article supplement (PMC3568969)
Supplement: Supp_Fig1.pdf [file Supp_Fig1.pdf]

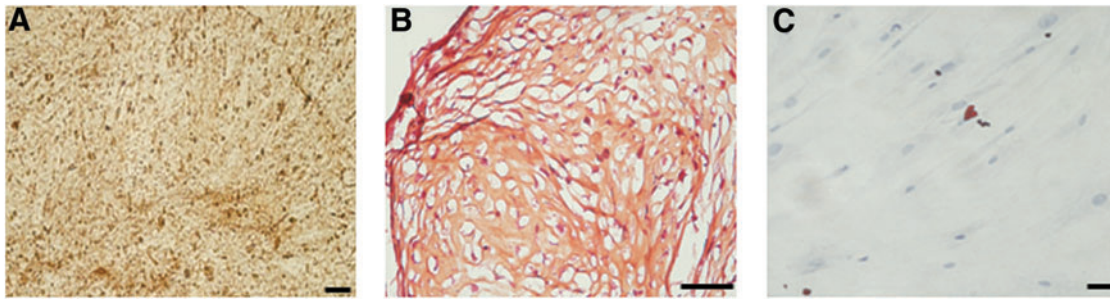

**SUPPLEMENTARY FIG. S1.** Multilineage differentiation potential of human umbilical cord blood (hUCB)-MSCs. hUCB-MSCs were differentiated under specific culture conditions. **(A)** For osteogenic induction, cells were treated with  $\beta$ -glycerophosphate (10 mM), dexamethasone (0.1  $\mu$ M), and L-ascorbate 2-phosphate (50  $\mu$ M) for 14 days and then stained with von Kossa. **(B)** For chondrogenic differentiation, cells were cultured in a pellet in the presence of transforming growth factor-beta- $\beta$ 3 (10 ng/mL), 100 nM dexamethasone, 50 mg/mL ITS+Premix, 500 ng/mL bone morphogenic protein-6, 100  $\mu$ g/mL sodium pyruvate, 40  $\mu$ g/mL L-proline, and 50  $\mu$ g/mL L-ascorbate 2-phosphate for 21 days, and then sulfated proteoglycans were visualized with Safranin-O staining. **(C)** Adipogenic differentiation was induced using dexamethasone (1  $\mu$ M), 3-isobutyl-1-methylxanthine (0.5 mM), and insulin (10  $\mu$ g/mL) for 28 days, and the cells were stained with Oil-Red-O staining. Scale bars = 50  $\mu$ m.
