# Supplementary material
Source: PubMed Central journal article supplement (PMC3568969)
Supplement: Supp_Table1.pdf [file Supp_Table1.pdf]

## Supplementary Data

SUPPLEMENTARY TABLE S1. SEQUENCES OF POLYMERASE CHAIN REACTION PRIMERS USED IN REVERSE TRANSCRIPTION-POLYMERASE CHAIN REACTION TO AMPLIFY EACH GENE

| <i>Gene</i>          | <i>Primer</i> | <i>Sequences (5' → 3')</i>   | <i>PCR product size (bp)</i> |
|----------------------|---------------|------------------------------|------------------------------|
| <i>Runx2</i>         | Forward       | CTGTGGTAACCGTCATGGCC         | 49                           |
|                      | Reverse       | GGAGCTCGGCCGAGTAGTTC         |                              |
| Osteocalcin          | Forward       | CCACCCGGGAGCAGTGT            | 117                          |
|                      | Reverse       | CTAAATAGTGATACCGTAGATGCGTTTG |                              |
| Osterix              | Forward       | ATTGAATTGGAGGAATGGT          | 217                          |
|                      | Reverse       | CTTGAAGTACGTGTAACGTG         |                              |
| Type 1 collagen      | Forward       | GCGAAGGCAACAGTCGCT           | 101                          |
|                      | Reverse       | CTTGGTGGTTTTGTATTTCGATGAC    |                              |
| Alkaline phosphatase | Forward       | TCAGGGCAATGAGGTCACATC        | 68                           |
|                      | Reverse       | CACAATGCCACGGACTTC           |                              |
| $\beta$ -actin       | Forward       | TGGGTATGGAATCCTGTGGC         | 103                          |
|                      | Reverse       | CCAGACAGCACTGTGTTGGC         |                              |

PCR, polymerase chain reaction.
