# Supplementary material
Source: PubMed Central journal article supplement (PMC3568969)
Supplement: Supp_Table2.pdf [file Supp_Table2.pdf]

SUPPLEMENTARY TABLE S2. CORTICAL BONE MICROSTRUCTURE PARAMETERS IN THE FEMUR DIAPHYSIS  
IN MICE AT 8 WEEKS AFTER TREATMENT

|                                           | <i>Sham-Vehicle</i><br>(n = 8) | <i>OVX-Vehicle</i><br>(n = 8) | <i>OVX-MSc</i><br>(n = 8) | <i>OVX-CM</i><br>(n = 8) | <i>OVX-DFB</i><br>(n = 8) | <i>OVX-Zol</i><br>(n = 8) |
|-------------------------------------------|--------------------------------|-------------------------------|---------------------------|--------------------------|---------------------------|---------------------------|
| Cortical area (mm <sup>2</sup> )          | 0.69±0.02                      | 0.68±0.04                     | 0.70±0.03                 | 0.71±0.02                | 0.71±0.05                 | 0.70±0.06                 |
| Cortical thickness (mm)                   | 0.25±0.01                      | 0.24±0.01                     | 0.25±0.01                 | 0.25±0.01                | 0.24±0.02                 | 0.23±0.01                 |
| Area inside periosteum (mm <sup>2</sup> ) | 0.99±0.02                      | 0.99±0.06                     | 1.01±0.04                 | 0.99±0.04                | 1.00±0.06                 | 1.01±0.08                 |
| Cortical area fraction (%)                | 0.70±0.01                      | 0.69±0.02                     | 0.69±0.01                 | 0.71±0.01                | 0.70±0.03                 | 0.69±0.03                 |
| Cortical perimeter (mm)                   | 6.21±0.11                      | 6.36±0.21                     | 6.43±0.19                 | 6.40±0.17                | 6.39±0.30                 | 6.46±0.64                 |
| Periosteal perimeter (mm)                 | 4.01±0.11                      | 4.09±0.22                     | 4.25±0.10                 | 4.20±0.09                | 4.12±0.19                 | 4.29±0.51                 |
| Endosteal perimeter (mm)                  | 2.20±0.03                      | 2.27±0.10                     | 2.18±0.10                 | 2.20±0.09                | 2.23±0.10                 | 2.17±0.22                 |

CM, conditioned medium; OVX, ovariectomy; DFB, dermal fibroblast; Zol, zoledronate.
